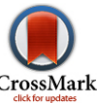

## Correction

# Correction: Feasibility of Low-Dose Contrast Medium High Pitch CT Angiography for the Combined Evaluation of Coronary, Head and Neck arteries

## The PLOS ONE Staff

Equal contribution should have been assigned. The first two authors, Zhiwei Wang and Yu Chen, should be noted as contributing equally to this work and are both first authors.

There is an error in the corresponding author designation. The correct corresponding authors are: Yining Wang (wangyining@pumch.cn), Huadan Xue (bjdanna95@hotmail.com) and Zhengyu Jin (jin\_zhengyu@163.com).

## Reference

1. Wang Z, Chen Y, Wang Y, Xue H, Jin Z, et al. (2014) Feasibility of Low-Dose Contrast Medium High Pitch CT Angiography for the Combined Evaluation of Coronary, Head and Neck Arteries. PLoS ONE 9(3): e90268. doi:10.1371/journal.pone.0090268

**Citation:** The PLOS ONE Staff (2014) Correction: Feasibility of Low-Dose Contrast Medium High Pitch CT Angiography for the Combined Evaluation of Coronary, Head and Neck arteries. PLoS ONE 9(6): e100025. doi:10.1371/journal.pone.0100025

**Published:** June 6, 2014

**Copyright:** © 2014 The PLOS ONE Staff. This is an open-access article distributed under the terms of the Creative Commons Attribution License, which permits unrestricted use, distribution, and reproduction in any medium, provided the original author and source are credited.
